# Supplementary material for: lncRNA-mRNA Co-Expression and Regulation Analysis in Lung Fibroblasts from Idiopathic Pulmonary Fibrosis
Source: Noncoding RNA. 2024 Apr 17;10(2):26. doi: 10.3390/ncrna10020026 (PMC11054336; doi:10.3390/ncrna10020026)
Supplement: Supplementary file 1 [file ncrna-10-00026-s001.zip › Supplementary tables.xlsx]

## Sheet: Table S1
Table S1. Complete list of over-expressed mRNAs
ID_Ensembl	Simbolo	P_adjustado	Log2FC
ENSG00000101825.8	MXRA5	0	1.20012
ENSG00000103742.12	BICC1	0	0.593226
ENSG00000132639.12	EDA2R	0	1.05346
ENSG00000142920.17	IGDCC4	0	1.68595
ENSG00000158301.18	GPNMB	0	1.12749
ENSG00000170476.16	PAMR1	0	1.03839
ENSG00000204291.11	COL15A1	0	0.891342
ENSG00000241490.1	BHMT2	0	1.01561
ENSG00000244694.7	PTCHD4	0	0.986679
ENSG00000268297.1	PLPPR4	0	1.20246
ENSG00000277734.8	FRMD6	0	0.638071
ENSG00000287543.1	SLC16A6	0	1.39839
ENSG00000114455.13	SFRP2	3.8356e-14	1.45598
ENSG00000187260.15	DUSP10	3.8356e-14	0.770732
ENSG00000117560.8	TRAC	1.65328e-13	0.801217
ENSG00000149090.11	FHL2	1.65328e-13	0.675705
ENSG00000286130.1	NLRP1	2.23743e-13	0.548725
ENSG00000198691.13	FAT1	3.09322e-13	0.555658
ENSG00000010932.17	ITIH5	1.04607e-12	0.631721
ENSG00000280234.1	EPHA3	1.17199e-12	1.2153
ENSG00000077984.6	PRTFDC1	1.68455e-12	0.696232
ENSG00000044524.11	CCR7	1.16077e-11	1.02622
ENSG00000164266.10	GLT8D2	1.96356e-11	0.725366
ENSG00000090659.18	SELENOW	2.25022e-11	0.511755
ENSG00000162745.10	PLAU	2.47682e-11	1.15346
ENSG00000145536.15	DYNLL1	4.31904e-11	0.359822
ENSG00000181036.14	DOCK10	4.67512e-11	0.594032
ENSG00000102524.11	STEAP1	5.43376e-11	0.85082
ENSG00000087494.16	SNAP25	6.68516e-11	0.952396
ENSG00000146013.11	C3orf70	1.02846e-10	1.23938
ENSG00000163520.14	EGFL6	1.17019e-10	0.649119
ENSG00000279142.1	STK32B	1.22838e-10	1.23641
ENSG00000224577.3	FHOD3	1.25421e-10	0.825376
ENSG00000228290.7	TNPO1	1.59673e-10	0.254987
ENSG00000259571.2	CAMK1D	2.20981e-10	0.697101
ENSG00000170624.13	PTGS1	2.65866e-10	0.927779
ENSG00000235162.8	TIGIT	3.8433e-10	0.92282
ENSG00000249992.2	ENTPD1	5.77956e-10	0.578209
ENSG00000214128.11	STEAP2	1.06662e-09	0.541714
ENSG00000139926.15	CDH6	1.11725e-09	0.640616
ENSG00000169402.15	MMP16	1.49251e-09	1.08101
ENSG00000163873.10	PLXNA4	1.49359e-09	0.93382
ENSG00000203930.12	EPHB2	1.60034e-09	0.854783
ENSG00000225210.10	FBLN2	1.84671e-09	0.911045
ENSG00000106477.19	PDLIM4	1.96785e-09	0.853615
ENSG00000253522.6	AZIN2	2.25935e-09	0.81734
ENSG00000183908.7	ZMAT3	2.41066e-09	0.410165
ENSG00000137078.9	CCND2	2.8184e-09	0.516002
ENSG00000281103.2	CD163L1	2.92767e-09	1.27504
ENSG00000165457.14	FKBP14	3.72054e-09	0.348068
ENSG00000214548.18	C12orf75	4.53716e-09	0.761245
ENSG00000159618.16	LEF1	5.8402e-09	1.02987
ENSG00000109472.14	FMO1	9.52553e-09	0.806216
ENSG00000159259.8	HSPA4L	9.52553e-09	0.498775
ENSG00000129151.9	ARNTL2	2.15196e-08	0.647044
ENSG00000224934.5	S100A4	2.27275e-08	0.967582
ENSG00000125378.16	TNFSF13B	2.3919e-08	0.680265
ENSG00000128218.8	TNFRSF11B	6.17172e-08	0.828795
ENSG00000228672.4	CLIC6	6.27957e-08	0.857035
ENSG00000233369.7	FAM180A	7.08262e-08	1.00174
ENSG00000102096.9	ADAMTS14	7.75817e-08	1.08242
ENSG00000147689.16	ECM1	1.01732e-07	0.503705
ENSG00000117174.11	AMPH	1.33197e-07	0.735793
ENSG00000267013.6	BMP4	1.42216e-07	0.766207
ENSG00000253960.1	SH2B3	1.70494e-07	0.468312
ENSG00000138316.11	ARHGAP15	1.79122e-07	0.51407
ENSG00000100036.13	ASB1	2.37151e-07	0.42945
ENSG00000270933.1	SGCD	2.66249e-07	0.661491
ENSG00000161133.16	OLFML2B	2.71223e-07	0.805883
ENSG00000164946.19	GZMB	2.78872e-07	0.817331
ENSG00000119403.15	PDE9A	2.87412e-07	1.05702
ENSG00000113319.13	SLC4A7	3.04322e-07	0.498561
ENSG00000173540.12	SVIL	3.04322e-07	0.641476
ENSG00000084734.9	CALM1	3.56721e-07	0.359258
ENSG00000221995.5	HGF	4.53206e-07	0.764023
ENSG00000269981.1	SP140	4.82788e-07	0.574239
ENSG00000141748.13	FOXL1	5.1363e-07	0.964529
ENSG00000178860.8	FREM1	6.87638e-07	0.607976
ENSG00000175711.8	MSC	8.00906e-07	0.729629
ENSG00000228459.4	AGPS	8.90247e-07	0.347964
ENSG00000002586.20_PAR_Y	MX2	9.82862e-07	0.629865
ENSG00000162676.12	TMEM176B	1.05855e-06	0.52577
ENSG00000167196.14	TRPA1	1.47833e-06	0.939272
ENSG00000076662.10	FCMR	1.52247e-06	0.995862
ENSG00000183671.12	CPE	1.61914e-06	0.88026
ENSG00000141314.13	PCDH18	2.054e-06	0.6404
ENSG00000165730.16	KYNU	4.15681e-06	0.826051
ENSG00000236390.1	DLL4	5.10383e-06	1.06427
ENSG00000213996.13	COL7A1	5.34417e-06	0.768559
ENSG00000143369.15	ADAMTS16	5.48813e-06	1.06313
ENSG00000172927.8	FOLR2	1.07193e-05	0.572385
ENSG00000256650.1	POGLUT3	1.15492e-05	0.31822
ENSG00000119013.9	CRISPLD1	1.21626e-05	0.932994
ENSG00000106080.10	NAV1	1.32759e-05	0.578641
ENSG00000271414.1	SATB2	1.3292e-05	0.493875
ENSG00000112208.11	RFK	1.34662e-05	0.42975
ENSG00000214922.9	HHLA2	1.34662e-05	0.749267
ENSG00000019505.8	HELLS	1.36254e-05	0.582825
ENSG00000164920.9	HSPA12A	1.59728e-05	0.507235
ENSG00000110092.3	SLFN12	1.67119e-05	0.409094
ENSG00000237181.1	OSR2	2.43604e-05	1.05243
ENSG00000137745.12	FAM118A	2.44366e-05	0.41917
ENSG00000137976.7	GPR85	2.94176e-05	0.621739
ENSG00000149679.11	SLC39A6	3.40273e-05	0.219883
ENSG00000285447.1	RUNX2	3.44352e-05	0.399447
ENSG00000151812.15	TMEM63A	3.46771e-05	0.266262
ENSG00000120820.12	CST7	3.50747e-05	0.701516
ENSG00000246366.6	SPATS2L	3.91649e-05	0.325171
ENSG00000189184.11	AIG1	4.40136e-05	0.271812
ENSG00000255052.5	NTF3	4.4842e-05	0.760942
ENSG00000114638.8	NOL12	4.6546e-05	0.510187
ENSG00000100557.9	MAP4K4	5.33967e-05	0.238461
ENSG00000129195.16	FAM107B	5.493e-05	0.596691
ENSG00000171916.17	DMGDH	6.44896e-05	0.798256
ENSG00000284709.1	EMP1	6.56975e-05	0.579886
ENSG00000232460.4	CHRNA1	6.59279e-05	1.05435
ENSG00000153283.13	BPGM	8.22462e-05	0.411356
ENSG00000005469.11	RUNX3	8.32852e-05	0.884081
ENSG00000244218.3	TMEM71	8.4626e-05	0.78862
ENSG00000180658.4	CCN3	9.16406e-05	0.799996
ENSG00000029153.14	PNMA1	9.55568e-05	0.388461
ENSG00000168827.14	MOSPD2	9.59663e-05	0.240407
ENSG00000196711.9	PTHLH	9.59663e-05	0.900944
ENSG00000198758.10	LPXN	9.59663e-05	0.829401
ENSG00000287151.1	CTSK	0.000101965	0.776503
ENSG00000180019.5	XG	0.000111391	0.993398
ENSG00000165383.11	MID1	0.000125999	0.47021
ENSG00000172965.16	PDGFA	0.000125999	0.474962
ENSG00000248483.7	ABCB1	0.000134829	0.846236
ENSG00000228716.7	APBB1IP	0.000136698	0.657569
ENSG00000255836.1	PTGER4	0.000140135	0.61219
ENSG00000257243.1	MYCBP2	0.000143187	0.210887
ENSG00000166349.9	CRACR2A	0.000143962	0.627123
ENSG00000259770.2	SLF2	0.000143962	0.197985
ENSG00000132840.10	MAGOHB	0.000153522	0.357875
ENSG00000133169.6	VOPP1	0.000153522	0.353118
ENSG00000175356.13	KIF21A	0.000156012	0.468975
ENSG00000160868.15	CD96	0.000157092	0.829146
ENSG00000100297.16	ZCCHC9	0.00018269	0.280456
ENSG00000177675.8	TIAF1	0.000185526	0.409806
ENSG00000124333.16	MCTP2	0.000215335	0.536861
ENSG00000284932.1	SCN5A	0.000217497	0.901802
ENSG00000174145.8	FOXC1	0.000223399	0.688022
ENSG00000265566.2	TRDMT1	0.000223399	0.31396
ENSG00000232774.8	KRT80	0.000223747	0.694017
ENSG00000283361.2	ABCA4	0.000224509	0.857959
ENSG00000178202.13	NOX4	0.000231233	0.659418
ENSG00000238121.6	RTP4	0.000235935	0.643408
ENSG00000256084.1	IL24	0.000256598	0.932891
ENSG00000233306.2	MAP4K1	0.00025869	0.474961
ENSG00000225684.4	PAK3	0.000261075	0.716151
ENSG00000102468.10	PDE4B	0.000261249	0.530104
ENSG00000249751.4	TMEM158	0.000265521	0.92771
ENSG00000253293.5	ZNF267	0.00028657	0.344446
ENSG00000186007.10	ABCA13	0.000289161	0.923302
ENSG00000169989.3	NBPF3	0.000331434	0.50831
ENSG00000257910.1	SALL1	0.000332572	0.899069
ENSG00000142945.13	EXOC6	0.000357084	0.435847
ENSG00000173535.14	STMN3	0.000363542	0.712233
ENSG00000143512.13	STEAP3	0.000368991	0.549464
ENSG00000167291.16	SHC4	0.000375716	0.709855
ENSG00000118729.11	PLA2G4A	0.000376992	0.580631
ENSG00000186115.13	ZEB1	0.000436015	0.355191
ENSG00000233560.2	SRGAP1	0.000502743	0.259197
ENSG00000115758.13	ACP7	0.000513722	0.93725
ENSG00000075884.14	ELK3	0.000529595	0.294038
ENSG00000226674.11	F2RL2	0.000544959	0.599974
ENSG00000183486.13	TRIM36	0.000559922	0.615302
ENSG00000157005.4	NME1	0.000564905	0.472439
ENSG00000166920.12	LIF	0.000577539	0.752632
ENSG00000267544.1	ADAM8	0.00058716	0.811706
ENSG00000221491.2	DPF3	0.000682138	0.509242
ENSG00000100865.15	PURPL	0.000693643	0.813236
ENSG00000080644.16	IVNS1ABP	0.000717357	0.278354
ENSG00000035499.13	CDKN3	0.000749726	0.532729
ENSG00000271880.1	GPR37	0.000779218	0.657814
ENSG00000204969.7	PDE10A	0.000799275	0.875366
ENSG00000019991.18	SLC28A3	0.000822654	0.756346
ENSG00000220585.4	FAR2	0.000843954	0.446975
ENSG00000241493.1	AIFM2	0.000843954	0.412823
ENSG00000137225.13	COL24A1	0.000850235	0.591088
ENSG00000151224.13	C1QTNF2	0.000851838	0.738664
ENSG00000101890.5	WEE1	0.000864496	0.348322
ENSG00000216285.5	KCNN4	0.000927634	0.729942
ENSG00000232821.1	ADAMTS6	0.000952161	0.429276
ENSG00000242318.1	RASGRF1	0.000955633	0.806948
ENSG00000137265.15	COL8A1	0.0010148	0.441695
ENSG00000237187.9	SYT16	0.0010148	0.832643
ENSG00000052850.8	SPIN1	0.00103089	0.19688
ENSG00000159289.6	OAF	0.00109577	0.448666
ENSG00000181991.16	TNFAIP2	0.00112699	0.409028
ENSG00000248863.2	RHBDF1	0.00123846	0.313881
ENSG00000134077.16	NEK10	0.00131802	0.635237
ENSG00000130529.16	RASGRF2	0.00135864	0.61792
ENSG00000252213.1	TBX18	0.00141277	0.780232
ENSG00000259584.1	FZD1	0.00144957	0.406166
ENSG00000235698.1	RNFT2	0.00146383	0.517716
ENSG00000253553.7	MYO5A	0.00148679	0.346426
ENSG00000101198.15	PTPN22	0.00151386	0.614885
ENSG00000121743.4	ADAMTS19	0.00155415	0.882987
ENSG00000111639.8	KCNS3	0.00160674	0.455995
ENSG00000217385.1	TMEM176A	0.00160674	0.480984
ENSG00000171502.15	CD99	0.00161945	0.811747
ENSG00000257219.6	ZNF215	0.00163325	0.579598
ENSG00000260625.3	CROT	0.00168921	0.411901
ENSG00000286694.1	PPM1H	0.00172021	0.566749
ENSG00000105675.9	ACKR3	0.00172755	0.715592
ENSG00000138615.6	SERPINF1	0.00175668	0.56205
ENSG00000095794.19	IL12RB1	0.0018424	0.721434
ENSG00000230383.1	AKR1B10	0.00185211	0.721945
ENSG00000213478.2	PTPN7	0.00185224	0.481302
ENSG00000242244.1	FAT2	0.00185903	0.753927
ENSG00000177337.8	DPEP1	0.00188671	0.754249
ENSG00000260083.2	DUSP4	0.00190492	0.541977
ENSG00000250155.2	PLCB4	0.00212569	0.564255
ENSG00000259583.3	EMB	0.00213743	0.518072
ENSG00000262503.1	XAF1	0.00221335	0.441205
ENSG00000198768.11	LTO1	0.00227758	0.216969
ENSG00000238084.4	MYH13	0.0024958	0.793432
ENSG00000135916.16	IRF4	0.00255019	0.548879
ENSG00000186710.11	CFAP298	0.00268378	0.444581
ENSG00000214021.16	LRP8	0.00285056	0.498672
ENSG00000017483.15	SNHG4	0.00287259	0.413218
ENSG00000174482.10	ITPKA	0.00306576	0.65864
ENSG00000186076.5	SEPTIN8	0.00336833	0.277526
ENSG00000088325.16	PTGER3	0.00345869	0.758385
ENSG00000073282.13	NUDT1	0.00347163	0.43929
ENSG00000171408.14	CDCA3	0.00374263	0.59628
ENSG00000121858.11	TENT5C	0.00392366	0.599055
ENSG00000178773.15	HIST1H4C	0.00401379	0.639289
ENSG00000259932.1	ST3GAL4	0.00401379	0.22608
ENSG00000286449.1	CNTNAP3B	0.00461146	0.732617
ENSG00000047457.14	PI15	0.0046238	0.624951
ENSG00000230404.1	RAB29	0.00464155	0.217458
ENSG00000146858.8	NR4A2	0.00464408	0.67001
ENSG00000235806.1	SETD9	0.00495823	0.427189
ENSG00000179111.9	TMEM171	0.00496254	0.681134
ENSG00000135272.10	RFX8	0.00520322	0.757877
ENSG00000267128.2	MNAT1	0.00533636	0.34968
ENSG00000153563.15	SUGCT	0.00533906	0.480451
ENSG00000251364.7	ERCC4	0.00555488	0.229897
ENSG00000164308.16	ARHGAP22	0.00556532	0.587007
ENSG00000280852.2	GLB1L3	0.00595501	0.776436
ENSG00000261251.1	KCNN2	0.00598365	0.731907
ENSG00000162520.15	HTR1B	0.0060593	0.748211
ENSG00000233360.4	CHAC1	0.00609406	0.669633
ENSG00000160224.17	PIP4K2B	0.00635007	0.852959
ENSG00000146966.13	LNPK	0.00636203	0.200494
ENSG00000168314.17	B4GALNT1	0.00643992	0.729886
ENSG00000261231.6	MRPS36	0.00660769	0.380181
ENSG00000282951.1	SKA2	0.00702314	0.332594
ENSG00000254206.5	LTK	0.00747926	0.681952
ENSG00000185198.11	CAMK4	0.00768897	0.540701
ENSG00000207493.1	RASSF2	0.00772152	0.523092
ENSG00000243910.8	PAK1IP1	0.0077306	0.347135
ENSG00000229562.1	SHROOM1	0.00790903	0.288238
ENSG00000162892.16	OSR1	0.00845767	0.645274
ENSG00000259479.6	SLC16A14	0.00917735	0.435346
ENSG00000204711.9	ELFN1	0.00923167	0.825635
ENSG00000115137.12	PSG1	0.00928325	0.621568
ENSG00000279718.1	KIAA1841	0.00929227	0.285028
ENSG00000121988.18	RCN3	0.00942404	0.52943
ENSG00000267226.2	RAB3A	0.00970028	0.542152
ENSG00000214552.4	AZIN1	0.00975929	0.235687
ENSG00000137267.6	BDKRB2	0.0105189	0.630009
ENSG00000106123.12	CPNE7	0.0105394	0.709622
ENSG00000174720.16	GRIK2	0.0105677	0.776615
ENSG00000262979.1	CYP19A1	0.0109991	0.632909
ENSG00000228292.1	TENM1	0.011194	0.526372
ENSG00000184445.12	STAB2	0.0113314	0.770655
ENSG00000171462.15	COL27A1	0.0113924	0.465858
ENSG00000215179.5	WSCD1	0.011509	0.736136
ENSG00000132963.8	PHF11	0.0120605	0.249586
ENSG00000181929.13	C6	0.0129336	0.661161
ENSG00000146386.8	C4orf46	0.0136748	0.404035
ENSG00000253633.2	HPRT1	0.0136748	0.278199
ENSG00000226666.1	EXOSC9	0.0139769	0.362431
ENSG00000188984.12	ZNF684	0.0143611	0.40058
ENSG00000094804.12	SEPTIN7	0.0149373	0.15471
ENSG00000234323.7	ZDHHC11	0.0151471	0.482069
ENSG00000277367.1	ACKR4	0.0166435	0.745227
ENSG00000166866.13	APCDD1	0.0166941	0.604466
ENSG00000175806.15	PITPNC1	0.0168763	0.470217
ENSG00000114026.21	LPAR1	0.0175355	0.427018
ENSG00000119705.9	NSMAF	0.0175355	0.245025
ENSG00000161547.16	ZNF560	0.0175355	0.580121
ENSG00000122783.16	GPR55	0.0176555	0.726723
ENSG00000100351.17	LOXL3	0.0180367	0.43349
ENSG00000255397.1	UBE2T	0.018267	0.544122
ENSG00000137288.10	CARS	0.0186162	0.620498
ENSG00000100813.14	AADAT	0.0194092	0.30162
ENSG00000183963.18	ESM1	0.0194092	0.686963
ENSG00000104879.5	CCDC167	0.0195919	0.396329
ENSG00000198312.4	SSUH2	0.0201453	0.763756
ENSG00000142449.13	SLC17A9	0.0204563	0.4828
ENSG00000286623.1	LRRN4CL	0.0205356	0.589499
ENSG00000207975.1	MBOAT1	0.0214962	0.419167
ENSG00000174442.12	E2F3	0.0217217	0.273814
ENSG00000235268.2	ARHGAP18	0.0217885	0.463088
ENSG00000223343.1	CIP2A	0.0227515	0.446312
ENSG00000271415.1	RTN1	0.0230749	0.614435
ENSG00000163586.10	DCLRE1C	0.0243603	0.24494
ENSG00000163214.21	PM20D2	0.0245187	0.364924
ENSG00000176845.13	GNG11	0.0253949	0.41874
ENSG00000188158.15	SFXN3	0.0260885	0.310498
ENSG00000130368.5	AFP	0.0262386	0.726315
ENSG00000231128.6	CSGALNACT2	0.0262386	0.321748
ENSG00000170044.8	TAF1A	0.0275579	0.283017
ENSG00000261615.7	C1orf216	0.0275745	0.275819
ENSG00000173207.13	PTPN9	0.0276899	0.182229
ENSG00000110063.10	ANAPC7	0.0277755	0.190967
ENSG00000146376.11	TMX4	0.0288304	0.247837
ENSG00000250045.2	SH3TC2	0.0305226	0.550826
ENSG00000240541.3	CKS1B	0.0307354	0.437921
ENSG00000234061.1	GPR68	0.0308304	0.634561
ENSG00000165606.8	LACC1	0.0312638	0.323671
ENSG00000166024.13	PRXL2C	0.0312638	0.278163
ENSG00000246334.2	EPHB1	0.0313992	0.658586
ENSG00000199731.1	PPID	0.034929	0.20706
ENSG00000174371.17	RAD51AP1	0.0361619	0.525018
ENSG00000262905.1	LRRC8C	0.0367565	0.39618
ENSG00000171501.9	BEST3	0.0375921	0.721607
ENSG00000183625.15	NCAPH	0.0375921	0.560577
ENSG00000214711.10	NOTCH2	0.0375921	0.223368
ENSG00000224897.8	KRT7	0.037755	0.587482
ENSG00000145087.12	PLCB1	0.0381366	0.375494
ENSG00000258133.1	SLC20A1	0.041004	0.445637
ENSG00000257267.3	GSKIP	0.0413869	0.237576
ENSG00000004846.16	CMKLR1	0.0473494	0.596739
ENSG00000177432.8	PFKP	0.0473746	0.380015
ENSG00000184302.7	PRPF3	0.0474593	0.200946
ENSG00000183914.14	AEN	0.049096	0.331786

## Sheet: Table S2
Table S2. Complete list of under-expressed mRNAs
ID_Ensembl	Simbolo	P_adjustado	Log2FC
ENSG00000100453.13	HIF3A	0	-1.44597
ENSG00000197457.10	ANK3	0	-1.25165
ENSG00000122861.16	F11R	0	-1.17502
ENSG00000137648.18	FNBP1L	0	-1.02845
ENSG00000111700.12	LIMCH1	0	-1.02289
ENSG00000286811.1	IL1R2	0	-0.968356
ENSG00000126353.3	HSD17B6	0	-0.951637
ENSG00000181847.12	DUOX1	0	-0.873213
ENSG00000285877.1	NPTXR	0	-0.827792
ENSG00000145423.5	GSTA4	0	-0.566962
ENSG00000164761.9	OPHN1	7.37615e-14	-0.492133
ENSG00000160188.10	SEMA3F	5.39381e-13	-0.993391
ENSG00000161055.4	KLHL24	1.33754e-11	-0.559202
ENSG00000231210.3	GPC4	1.36883e-11	-0.87665
ENSG00000135925.9	KCNMB4	1.59817e-11	-1.03101
ENSG00000164647.9	NEBL	1.59817e-11	-0.932352
ENSG00000075035.10	TXNIP	1.8732e-11	-0.807497
ENSG00000185652.12	ASL	4.99587e-11	-0.446288
ENSG00000198821.10	TSC22D3	5.80872e-11	-0.697176
ENSG00000162888.4	XYLT1	1.02846e-10	-0.714903
ENSG00000154945.7	SIRPA	1.17019e-10	-0.553633
ENSG00000186462.9	CSRP2	1.99699e-10	-0.8215
ENSG00000227039.6	MARC1	1.99699e-10	-0.613319
ENSG00000221866.9	VSIG10	2.09558e-10	-0.568505
ENSG00000260326.1	MAFB	4.04942e-10	-0.960248
ENSG00000243811.10	TNIK	5.26901e-10	-0.557615
ENSG00000198759.12	SLC38A2	5.4232e-10	-0.521192
ENSG00000015413.9	PLIN5	1.06682e-09	-0.588903
ENSG00000138439.12	CELSR2	1.49251e-09	-0.554587
ENSG00000185053.14	GPRC5C	1.49562e-09	-1.20149
ENSG00000115641.19	SCN7A	1.60034e-09	-0.643278
ENSG00000251136.9	DPP4	2.01748e-09	-0.978972
ENSG00000131203.13	REPS2	2.03316e-09	-0.779903
ENSG00000240873.1	CDK18	3.70143e-09	-1.08204
ENSG00000133216.16	ZNF395	3.79771e-09	-0.566457
ENSG00000272872.1	SH3BGRL2	1.93882e-08	-0.42569
ENSG00000267405.1	TMEM37	2.62708e-08	-1.02439
ENSG00000185201.16	BMPER	2.93944e-08	-0.959108
ENSG00000006453.14	PKNOX2	3.26991e-08	-0.869595
ENSG00000170373.8	PRDX6	3.26991e-08	-0.275875
ENSG00000270011.7	ADORA1	3.52802e-08	-0.884191
ENSG00000143867.7	ARMC9	4.59753e-08	-0.452986
ENSG00000259343.7	CD36	4.92102e-08	-0.964146
ENSG00000218358.2	INSR	4.94361e-08	-0.561977
ENSG00000258875.6	SLCO2A1	5.27973e-08	-1.20404
ENSG00000184809.13	TNS1	6.27957e-08	-0.596769
ENSG00000227066.2	SH3YL1	7.57998e-08	-0.273133
ENSG00000189332.5	EFNB1	7.97294e-08	-0.76994
ENSG00000283265.1	LRATD2	8.85256e-08	-0.927275
ENSG00000083857.14	ST6GALNAC4	8.85256e-08	-0.507497
ENSG00000065618.21	FOXO3	1.28846e-07	-0.337442
ENSG00000110801.14	ATP2A3	1.33197e-07	-0.734926
ENSG00000011009.11	TACSTD2	1.70494e-07	-0.993717
ENSG00000273129.1	RALGAPA2	1.77521e-07	-0.393924
ENSG00000253665.1	CXADR	3.99104e-07	-0.797087
ENSG00000137558.9	USP53	4.78997e-07	-0.469136
ENSG00000120688.9	ZNF697	5.07599e-07	-0.431573
ENSG00000125046.15	COQ8A	5.60678e-07	-0.441518
ENSG00000205420.11	EIF4EBP2	6.12689e-07	-0.30938
ENSG00000018236.15	SELENOP	7.39931e-07	-0.820025
ENSG00000272115.1	SERPING1	7.39931e-07	-0.543116
ENSG00000137869.15	PLEKHB1	8.43444e-07	-0.716534
ENSG00000204869.8	OSBPL9	8.43444e-07	-0.320933
ENSG00000157214.14	PXMP4	1.04096e-06	-0.350129
ENSG00000196391.11	DISP1	1.10792e-06	-0.53478
ENSG00000113302.4	CERS4	1.13836e-06	-0.822833
ENSG00000274825.1	AGTPBP1	1.40498e-06	-0.438507
ENSG00000188822.8	METTL7A	1.44261e-06	-0.612328
ENSG00000286379.1	IRF6	1.70187e-06	-0.920688
ENSG00000253106.1	SPINT2	1.98288e-06	-0.850538
ENSG00000251301.7	GFOD1	2.30283e-06	-0.459875
ENSG00000054938.15	LGI3	2.91124e-06	-0.627262
ENSG00000122870.12	ABTB1	2.92311e-06	-0.452616
ENSG00000227992.1	MKNK2	2.95766e-06	-0.593294
ENSG00000197506.8	ABHD14B	3.59856e-06	-0.35416
ENSG00000092009.10	CASTOR2	4.46418e-06	-0.375549
ENSG00000167767.14	WASF3	4.82218e-06	-0.549344
ENSG00000222012.1	ERG28	4.99471e-06	-0.433127
ENSG00000196796.5	L3MBTL4	5.90821e-06	-0.836581
ENSG00000155011.9	TOX2	7.97384e-06	-0.502556
ENSG00000122223.13	MPP7	8.17922e-06	-0.658732
ENSG00000180264.11	FAM20A	9.27136e-06	-0.821626
ENSG00000214866.9	TRPC4	9.72408e-06	-0.738082
ENSG00000171864.5	IQCN	1.09474e-05	-0.858141
ENSG00000124772.12	SDC4	1.09474e-05	-0.498811
ENSG00000249241.1	P2RY1	1.12224e-05	-0.817796
ENSG00000212907.2	LURAP1L	1.12324e-05	-0.435446
ENSG00000277942.1	RHOU	1.74838e-05	-0.720317
ENSG00000007314.12	DHCR7	1.80019e-05	-0.592344
ENSG00000149782.11	LAMB3	1.98926e-05	-0.730622
ENSG00000230342.2	RNF128	2.09569e-05	-0.799748
ENSG00000285417.1	GLUL	2.62405e-05	-0.410712
ENSG00000205502.4	LAMP3	2.66382e-05	-0.589257
ENSG00000204256.13	RMDN2	2.92897e-05	-0.485829
ENSG00000237828.1	KLF7	3.40273e-05	-0.383061
ENSG00000251356.1	ARRB1	3.40685e-05	-0.640181
ENSG00000170315.14	ACSS2	3.59114e-05	-0.36013
ENSG00000249599.2	B4GALT5	3.63505e-05	-0.326409
ENSG00000198125.13	ERBB3	4.40136e-05	-0.564635
ENSG00000156103.16	ADM	4.6546e-05	-0.794969
ENSG00000138795.10	STARD10	4.91333e-05	-0.617298
ENSG00000255760.2	HYAL2	5.03228e-05	-0.505501
ENSG00000113263.12	PICK1	5.47686e-05	-0.523532
ENSG00000255248.9	LIFR	6.09516e-05	-0.56025
ENSG00000120332.16	FIBIN	6.3079e-05	-0.605521
ENSG00000198336.9	SFTPB	6.3079e-05	-0.567676
ENSG00000183644.13	TBC1D4	6.59279e-05	-0.317487
ENSG00000166104.15	NPR1	6.92927e-05	-0.64202
ENSG00000050730.16	CHD7	8.32852e-05	-0.610263
ENSG00000162706.13	GNMT	9.64453e-05	-0.727181
ENSG00000243519.1	GHR	0.000107154	-0.706142
ENSG00000222035.4	BNIP3L	0.000107154	-0.40117
ENSG00000165186.12	RHOB	0.000125999	-0.430619
ENSG00000187068.3	OTUD7B	0.000125999	-0.279982
ENSG00000235145.2	KLHDC8B	0.000125999	-0.24704
ENSG00000213523.10	MTSS1	0.000162906	-0.638208
ENSG00000237510.7	CITED2	0.000177863	-0.590788
ENSG00000157470.12	PNKD	0.000177863	-0.318759
ENSG00000223485.4	SNX30	0.000178458	-0.379668
ENSG00000174255.6	SP6	0.000192527	-0.894034
ENSG00000253528.2	PRSS21	0.000198838	-0.896227
ENSG00000280739.3	MED16	0.000215335	-0.316632
ENSG00000280202.1	CECR2	0.000216991	-0.832745
ENSG00000141577.14	FLRT3	0.000217497	-0.497786
ENSG00000101447.15	CALCOCO1	0.000232619	-0.291313
ENSG00000077264.15	ZNF518B	0.000253738	-0.36438
ENSG00000132256.19	SLC4A4	0.000289161	-0.52919
ENSG00000238273.3	PTK2B	0.000301435	-0.517456
ENSG00000182376.2	SLIT2	0.000309344	-0.501484
ENSG00000132972.19	NUAK1	0.000317233	-0.440635
ENSG00000284734.1	CCDC69	0.000320596	-0.425217
ENSG00000143314.12	OLFML2A	0.000331434	-0.683104
ENSG00000270062.1	TMEM53	0.000342248	-0.354502
ENSG00000229140.10	FILIP1	0.000353562	-0.726007
ENSG00000095585.16	KIAA1958	0.000368991	-0.416123
ENSG00000148600.15	PGM1	0.000371646	-0.415824
ENSG00000237013.1	OSTN	0.000386132	-0.792158
ENSG00000187017.17	FAM234A	0.000424796	-0.340746
ENSG00000261089.1	IRX3	0.000470206	-0.77159
ENSG00000165646.14	ADHFE1	0.000529595	-0.643036
ENSG00000185681.13	DRAM1	0.000529595	-0.462124
ENSG00000224644.1	HSPA2	0.0005507	-0.685535
ENSG00000135905.19	PRKCI	0.000570561	-0.382092
ENSG00000127824.14	FKBP8	0.000682138	-0.292865
ENSG00000225511.7	TEX2	0.000692991	-0.267054
ENSG00000143387.13	LGALSL	0.000724313	-0.484289
ENSG00000248967.1	H2AFJ	0.00077693	-0.285924
ENSG00000232818.2	JUP	0.000793922	-0.67145
ENSG00000205037.2	PSD4	0.000844839	-0.583308
ENSG00000273763.2	ADGRF5	0.000849441	-0.490001
ENSG00000104814.13	FBXO25	0.000878678	-0.299856
ENSG00000164283.13	STXBP2	0.00097362	-0.678754
ENSG00000233847.1	STAP2	0.00108018	-0.534209
ENSG00000257198.6	LDHD	0.00108586	-0.781107
ENSG00000254042.2	BEX2	0.00109263	-0.597956
ENSG00000162894.12	CACNB4	0.00124155	-0.467943
ENSG00000234835.1	BCL6	0.00131172	-0.399334
ENSG00000172123.12	CDH13	0.00133451	-0.492681
ENSG00000266522.1	SEMA4B	0.00154349	-0.410987
ENSG00000204950.4	RAB17	0.00158878	-0.586278
ENSG00000080709.15	CHD2	0.00169507	-0.248702
ENSG00000171496.4	PPM1L	0.00183278	-0.551975
ENSG00000234537.1	MSMO1	0.00194038	-0.492201
ENSG00000259422.1	MAP3K6	0.00200006	-0.39531
ENSG00000135537.17	PRR15	0.00208392	-0.845548
ENSG00000151136.15	GRTP1	0.0023055	-0.530982
ENSG00000229065.1	BRINP1	0.00259591	-0.751016
ENSG00000225968.7	CERT1	0.00260619	-0.203893
ENSG00000202191.1	IL1RL1	0.0028768	-0.909885
ENSG00000198157.11	EPHX2	0.00306576	-0.723411
ENSG00000286100.1	ABLIM1	0.00318451	-0.509842
ENSG00000205426.10	LRRC8B	0.00356512	-0.436654
ENSG00000002933.9	MAP3K8	0.0037095	-0.53484
ENSG00000135476.11	ABAT	0.00405258	-0.555736
ENSG00000111249.14	CCL28	0.00409478	-0.549772
ENSG00000112855.17	PIK3R1	0.00420399	-0.310215
ENSG00000259306.2	F2RL1	0.00453865	-0.588895
ENSG00000244153.1	TANC1	0.00461146	-0.288224
ENSG00000152932.8	TMED8	0.00479258	-0.255928
ENSG00000040199.18	SEZ6L2	0.00482255	-0.546496
ENSG00000164091.12	ADGRL1	0.00483609	-0.451503
ENSG00000185480.11	B3GALT1	0.00484564	-0.730622
ENSG00000267016.1	STAR	0.00500455	-0.750644
ENSG00000115459.18	SLC39A4	0.00504496	-0.485855
ENSG00000159147.18	ZDHHC17	0.00524161	-0.311059
ENSG00000226781.1	FAM49A	0.00535269	-0.376954
ENSG00000272518.1	EPHB4	0.00544525	-0.334985
ENSG00000267312.1	IL6ST	0.00548658	-0.371669
ENSG00000151963.4	HSD17B11	0.00568697	-0.326023
ENSG00000280312.1	BCAM	0.00579383	-0.447775
ENSG00000254401.2	MACROD2	0.00595501	-0.655784
ENSG00000266365.1	CUX1	0.00599958	-0.268664
ENSG00000220614.1	CACFD1	0.00601826	-0.605283
ENSG00000183484.12	ALDH1A2	0.00628986	-0.545072
ENSG00000236908.2	GRB7	0.00637004	-0.681076
ENSG00000160401.15	FBXO34	0.00651561	-0.234471
ENSG00000143851.15	SFXN2	0.00672846	-0.376198
ENSG00000153060.8	MAB21L3	0.00682629	-0.781446
ENSG00000219294.6	FBXL20	0.00685983	-0.290019
ENSG00000263006.6	ITPR2	0.00687265	-0.333681
ENSG00000164070.12	NUDT4	0.00696881	-0.273689
ENSG00000119723.17	SLC41A2	0.0070032	-0.289257
ENSG00000154822.18	MPZL3	0.00707695	-0.579003
ENSG00000274718.1	SGMS2	0.00715232	-0.4027
ENSG00000228818.1	TMEM246	0.007292	-0.484454
ENSG00000272630.1	LRIF1	0.00738042	-0.299194
ENSG00000258479.6	TUFT1	0.00784145	-0.563422
ENSG00000250057.1	CA12	0.00784145	-0.539653
ENSG00000225680.1	LDLRAP1	0.00818693	-0.382128
ENSG00000228695.10	KIAA0040	0.00819186	-0.586334
ENSG00000251595.7	SLC29A2	0.0091271	-0.570781
ENSG00000242686.4	KCNH5	0.00949167	-0.678256
ENSG00000226555.1	AGFG2	0.00961474	-0.267458
ENSG00000130701.4	PYGL	0.00962837	-0.342717
ENSG00000168894.10	THRA	0.00982112	-0.367538
ENSG00000011304.20	GNAI1	0.01106	-0.280886
ENSG00000117507.6	DCAF11	0.01106	-0.194677
ENSG00000166928.11	GPR4	0.0122341	-0.653074
ENSG00000156886.12	CENPBD1	0.0125901	-0.278256
ENSG00000180581.7	NR6A1	0.0127445	-0.446967
ENSG00000023902.14	CSTA	0.0134823	-0.555791
ENSG00000248711.1	ZFP36L1	0.0136748	-0.303018
ENSG00000258778.2	G0S2	0.0142541	-0.718863
ENSG00000251568.1	MAP2	0.014279	-0.606591
ENSG00000077800.13	FOXO1	0.0161261	-0.395761
ENSG00000243234.1	FHIT	0.0165348	-0.438654
ENSG00000154928.18	CDC42EP4	0.0166351	-0.361764
ENSG00000260911.2	RANBP17	0.0177511	-0.452419
ENSG00000229331.1	CPM	0.0182754	-0.49914
ENSG00000154188.10	GPER1	0.0183759	-0.606237
ENSG00000230927.3	FURIN	0.0186584	-0.346724
ENSG00000137802.14	GALNT2	0.0189328	-0.231111
ENSG00000115163.15	KLF11	0.0196803	-0.344046
ENSG00000105290.12	TAPT1	0.0198214	-0.26756
ENSG00000069812.11	KCNK3	0.0207894	-0.487628
ENSG00000268873.1	C16orf89	0.0215557	-0.552571
ENSG00000077152.11	DAPK2	0.0221552	-0.573472
ENSG00000136492.8	APOLD1	0.0224506	-0.442516
ENSG00000162641.20	SH2D4A	0.023606	-0.435992
ENSG00000144648.16	LIMD1	0.0239035	-0.295079
ENSG00000169896.18	PRDM11	0.0240722	-0.407008
ENSG00000269729.1	PCIF1	0.0262386	-0.258731
ENSG00000272779.1	MAP1LC3C	0.027006	-0.686882
ENSG00000166803.13	PIBF1	0.0307354	-0.177111
ENSG00000258521.1	MBTPS1	0.0333682	-0.192855
ENSG00000249550.7	ENDOD1	0.0367547	-0.295701
ENSG00000145908.12	RXRA	0.0382985	-0.292656
ENSG00000248727.6	EHD2	0.044625	-0.345508
ENSG00000116679.16	ERRFI1	0.0462758	-0.35403
ENSG00000120471.15	LRP10	0.0462758	-0.22856
ENSG00000250673.2	ARHGEF35	0.0474243	-0.55455
ENSG00000148154.10	IL22RA1	0.047429	-0.67195

## Sheet: Table S3
Table S3. Complete list of over-expressed lncRNAs
ID_Ensembl	Simbolo	P_adjustado	Log2FC
ENSG00000080572.12	DUXAP8	1.06544e-13	1.43934
ENSG00000131080.15	AL353138.1	1.17199e-12	1.10374
ENSG00000276718.1	DUXAP10	3.42301e-09	1.35736
ENSG00000123243.15	MIR100HG	7.97294e-08	0.553733
ENSG00000105610.5	LINC01081	3.62517e-07	1.0291
ENSG00000244306.11	DLGAP1-AS1	5.04037e-07	0.437053
ENSG00000286358.1	AC005831.1	1.1752e-06	0.911952
ENSG00000236700.6	MEG3	2.37556e-06	0.659677
ENSG00000113722.17	LINC00632	4.44127e-06	0.618216
ENSG00000235531.10	MSC-AS1	2.78298e-05	0.547998
ENSG00000227309.1	LUCAT1	3.64594e-05	0.688395
ENSG00000064300.9	ITGB2-AS1	9.16406e-05	0.642627
ENSG00000227619.3	DUXAP9	0.000168578	1.04776
ENSG00000277639.2	CES1P1	0.000217497	0.929111
ENSG00000272308.1	LINC00475	0.000217497	0.866647
ENSG00000160307.10	MIR4435-2HG	0.000505983	0.468714
ENSG00000266852.2	CRYBB2P1	0.000605941	0.245185
ENSG00000283156.1	AC004585.1	0.000656498	1.00289
ENSG00000207927.1	PVT1	0.000663619	0.398423
ENSG00000236320.3	AL359764.2	0.000724313	0.903475
ENSG00000255872.3	AC092535.5	0.000724313	0.517229
ENSG00000255921.1	AP000525.1	0.00128493	0.982163
ENSG00000183873.15	AL135818.1	0.00131349	0.740333
ENSG00000155530.3	SATB2-AS1	0.00161945	0.617885
ENSG00000160207.9	LNCOG	0.00164077	0.889376
ENSG00000197446.9	BTN2A3P	0.00164077	0.343677
ENSG00000268635.2	AC134312.5	0.00172755	0.728086
ENSG00000163577.8	AC009093.2	0.00260619	0.724363
ENSG00000261291.1	GSN-AS1	0.00308176	0.564895
ENSG00000270049.3	TMC3-AS1	0.00347996	0.585849
ENSG00000272153.1	RPL23AP82	0.00347996	0.290492
ENSG00000115252.18	TEX41	0.00406889	0.702504
ENSG00000206195.11	AC009061.2	0.00472253	0.496745
ENSG00000261243.1	SNHG12	0.00564952	0.427398
ENSG00000179314.14	LINC01232	0.00765012	0.678494
ENSG00000105792.19	ALOX12P2	0.00888608	0.708333
ENSG00000203756.8	AC091806.1	0.00970031	0.77911
ENSG00000207234.1	DLGAP1-AS2	0.0112166	0.394399
ENSG00000143195.13	FAM225B	0.0165633	0.748919
ENSG00000107736.21	LINC01989	0.0175591	0.730119
ENSG00000221464.1	AL355512.1	0.0182754	0.670093
ENSG00000235036.4	AC108058.1	0.018753	0.68395
ENSG00000144485.11	TUBAP2	0.0242772	0.530276
ENSG00000271918.1	DUBR	0.0250402	0.31448
ENSG00000250511.1	AC011365.1	0.0265929	0.586663
ENSG00000259402.1	RP9P	0.0282404	0.285164
ENSG00000136824.19	BMS1P1	0.0315152	0.416959
ENSG00000228251.1	AL713998.1	0.0385971	0.650765
ENSG00000256968.1	FAM111A-DT	0.0472401	0.317315

## Sheet: Table S4
Table S4. Complete list of under-expressed lncRNAs
ID_Ensembl	Simbolo	P_adjustado	Log2FC
ENSG00000117600.12	AC005183.1	0	-0.617503
ENSG00000150275.18	AC099494.2	1.17199e-12	-0.698142
ENSG00000138755.6	AC063960.2	2.47682e-11	-0.870614
ENSG00000276445.1	HSD3BP5	2.10639e-07	-0.971788
ENSG00000214803.3	AL606469.1	3.19304e-07	-1.15143
ENSG00000099256.19	RPARP-AS1	3.84098e-07	-0.473114
ENSG00000276293.4	ACOXL-AS1	1.47966e-06	-0.56087
ENSG00000152467.10	LINC01006	4.04333e-06	-0.532377
ENSG00000223023.1	RPL5P9	8.4626e-05	-0.649021
ENSG00000141316.13	AC084024.4	0.000267397	-0.504637
ENSG00000158516.12	AL442071.1	0.000296472	-0.7233
ENSG00000288019.1	AC008063.1	0.00131349	-0.765227
ENSG00000212421.1	AC073850.1	0.00174691	-0.768771
ENSG00000115875.19	PDIA3P1	0.002732	-0.282224
ENSG00000287037.1	EEF1A1P9	0.00287259	-0.483069
ENSG00000230423.3	AC124016.2	0.00405258	-0.461114
ENSG00000269489.1	AC026412.1	0.00440312	-0.460717
ENSG00000170965.10	MIR4500HG	0.00498229	-0.674247
ENSG00000179674.4	AC018647.2	0.007292	-0.259583
ENSG00000165868.14	AC055854.1	0.00867281	-0.66583
ENSG00000248693.1	PROSER2-AS1	0.00942404	-0.582781
ENSG00000172331.12	MIR210HG	0.0236363	-0.774328
ENSG00000229267.3	SPATA1	0.0266391	-0.517307
ENSG00000136695.14	AC008708.1	0.0297526	-0.678431
ENSG00000273179.1	LINC00622	0.0314801	-0.669261
ENSG00000177447.6	LINC01239	0.0465507	-0.662706
